# Supplementary material
Source: Springer Nature journal article supplement (https://www.springermedizin.de/resource/supplementary/12888_2010_785_MOESM2_ESM.pdf/9478740)
Supplement: MOESM2 [file 9478740]

- TS1 Seriousness of violence
- TS2 Seriousness of self-harm
- TS3 Immediacy of risk of violence
- TS4 Immediacy of risk of suicide
- TS5 Specialist forensic need (psychopathology)
- TS6 Absconding / eloping
- TS7 Preventing access
- TS8 Victim sensitivity/public confidence issues
- TS9 Co-morbidity (complex needs) relevant to risk of violence
- TS10 Institutional behaviour
- TS11 Legal process
